# Supplementary material for: Inhibition of tumor growth by cancer vaccine combined with metronomic chemotherapy and anti-PD-1 in a pre-clinical setting
Source: PubMed Central journal article supplement (PMC5790484; doi:10.18632/oncotarget.23181), 2017-12-08
Supplement: oncotarget-09-3576-s001.pdf [file oncotarget-09-3576-s001.pdf]

# Inhibition of tumor growth by cancer vaccine combined with metronomic chemotherapy and anti-PD-1 in a pre-clinical setting

## SUPPLEMENTARY MATERIALS

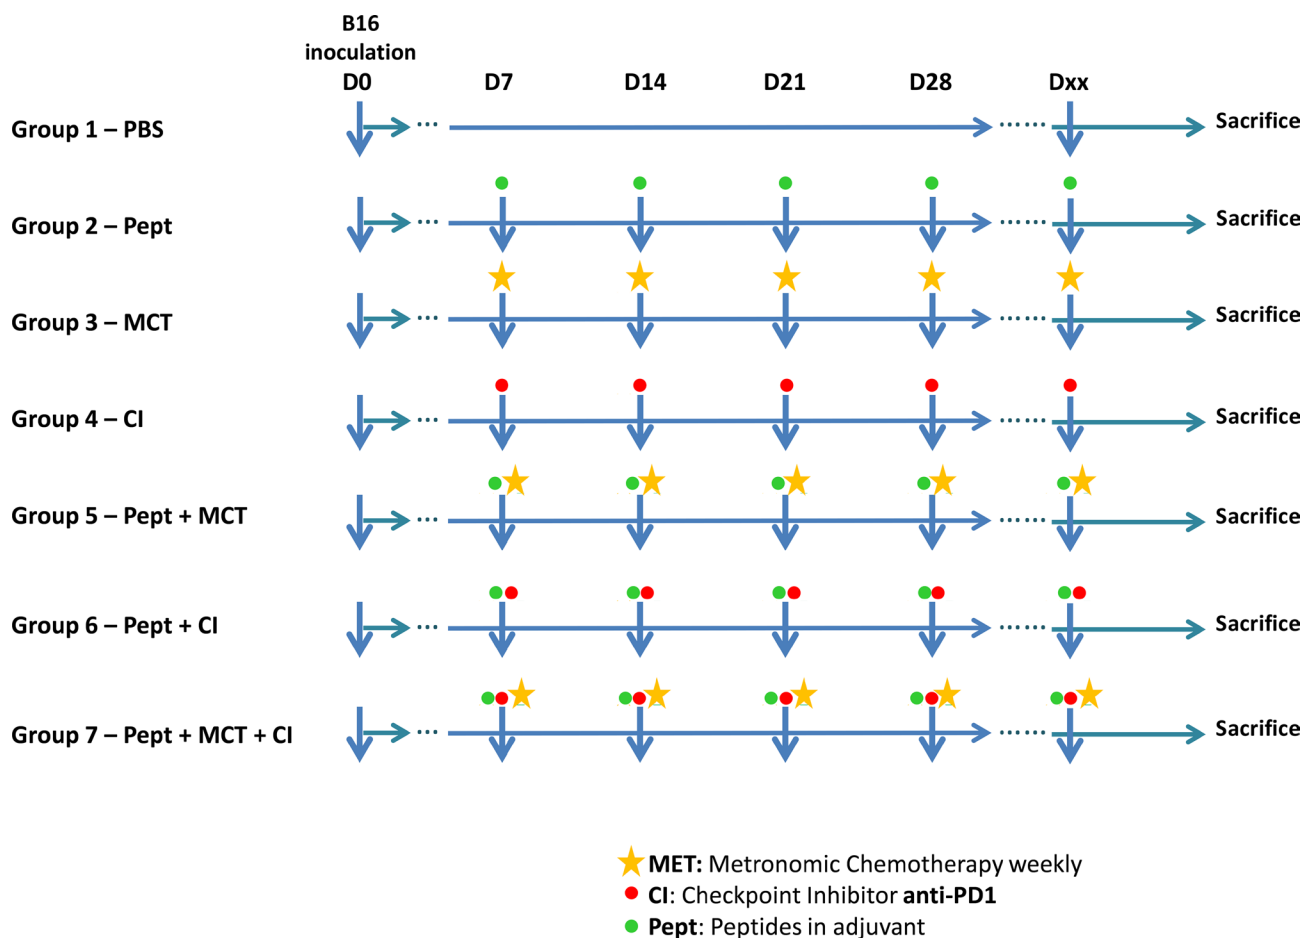

Supplementary Figure 1: Immunization protocol of the first experimental step.

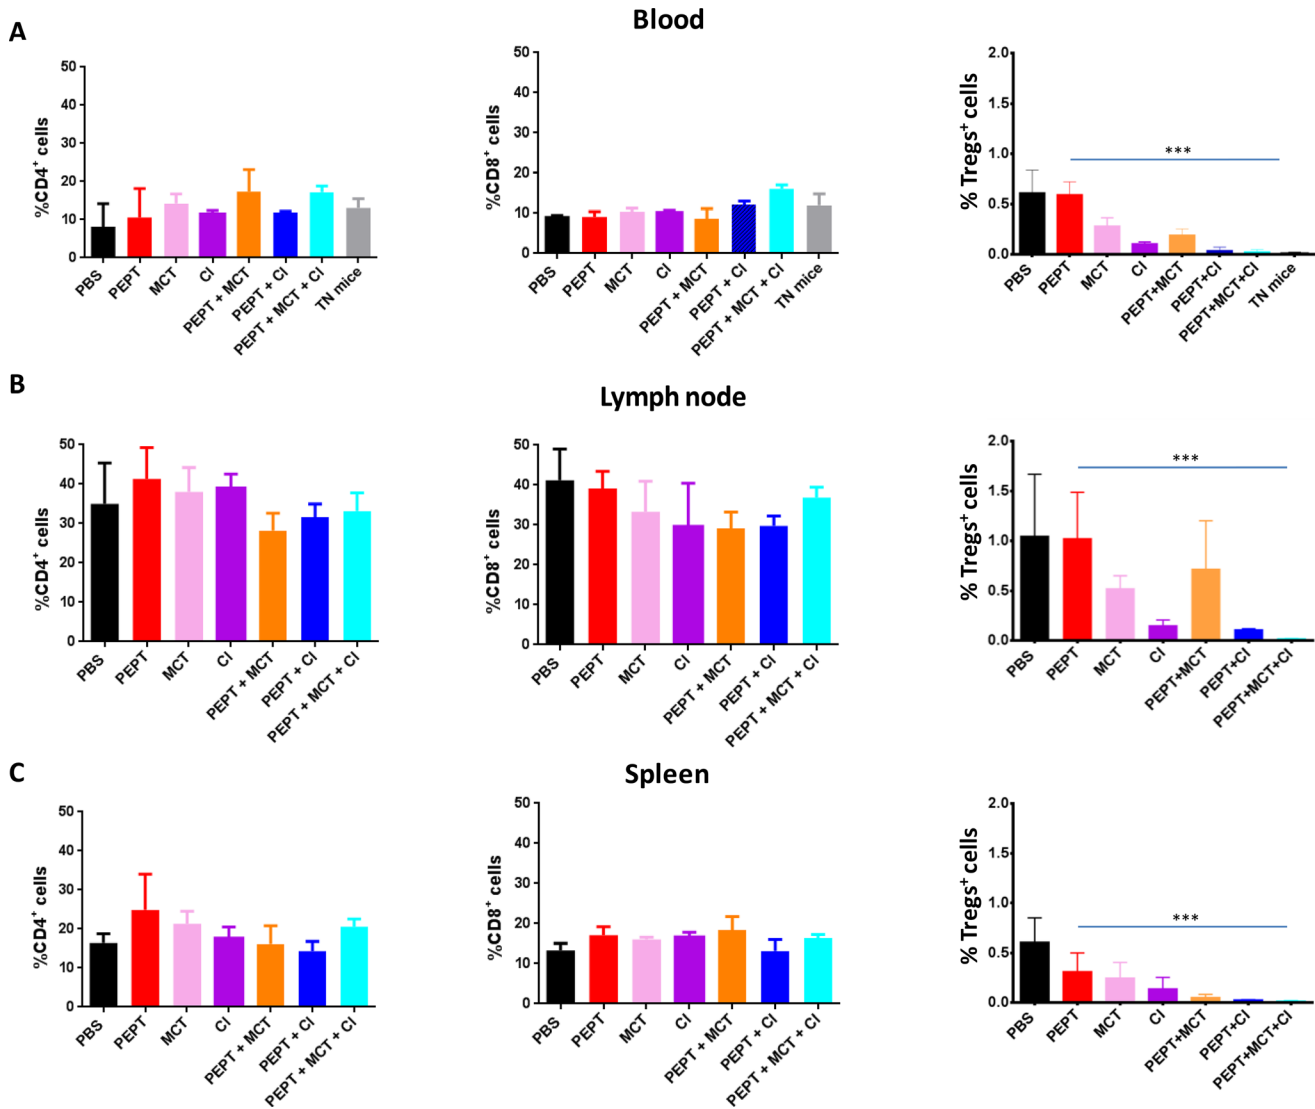

Supplementary Figure 2: Percentage of CD4+, CD8+ and CD4+ CD25+FoxP3+ T cells in the blood, lymph node and spleen districts represented as mean with SD in each experimental group.

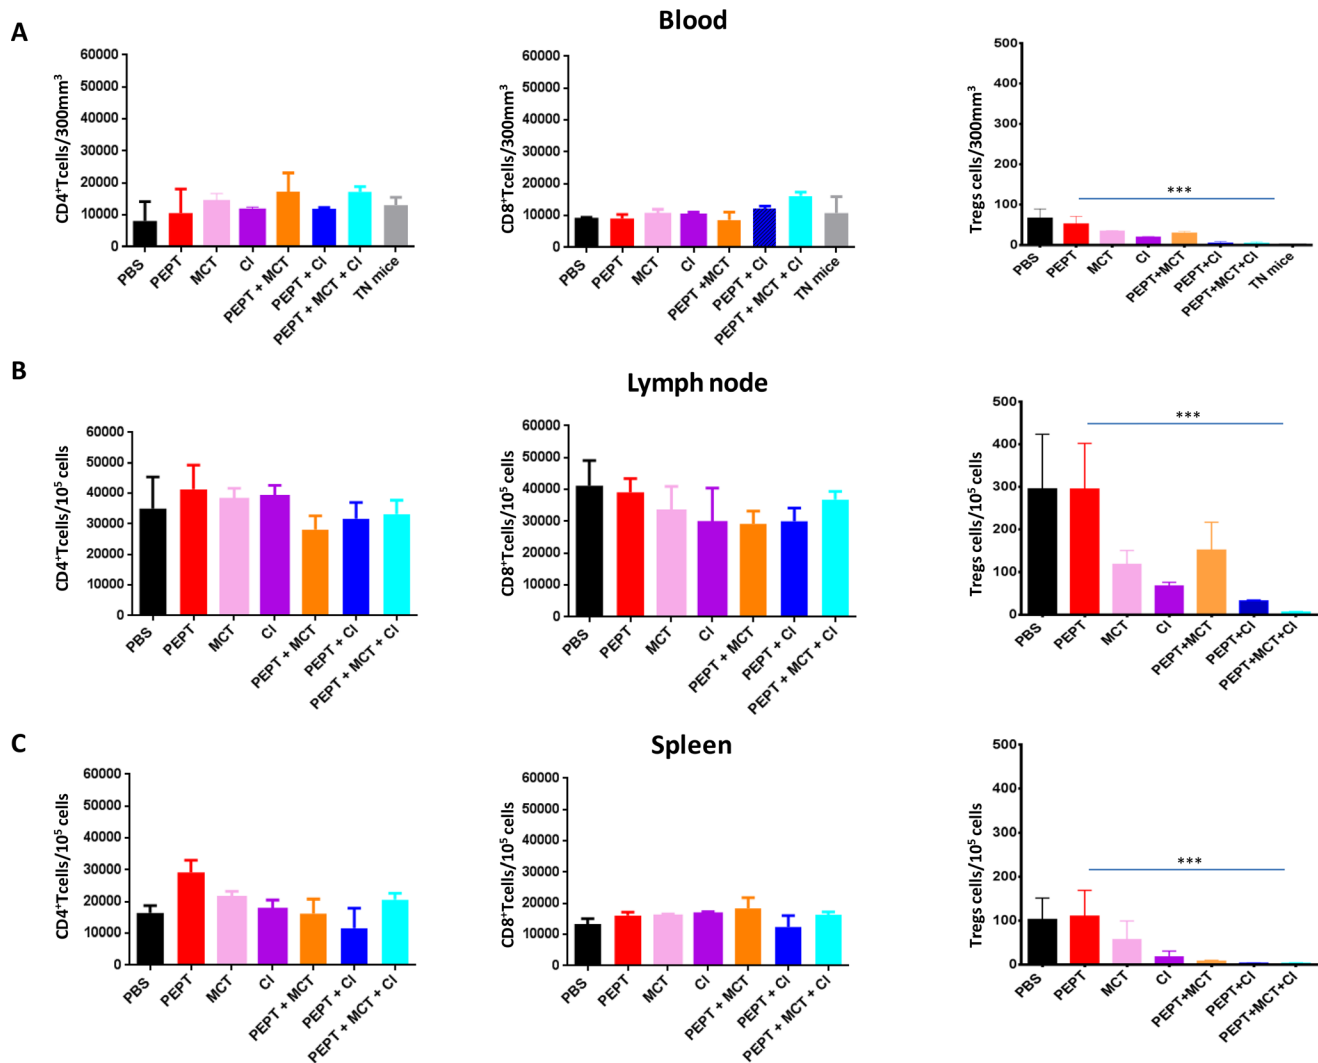

Supplementary Figure 3: Absolute numbers of CD4<sup>+</sup>, CD8<sup>+</sup> and CD4<sup>+</sup> CD25<sup>+</sup>FoxP3<sup>+</sup> T cells in the blood, lymph node and spleen districts represented as mean with SD in each experimental group.

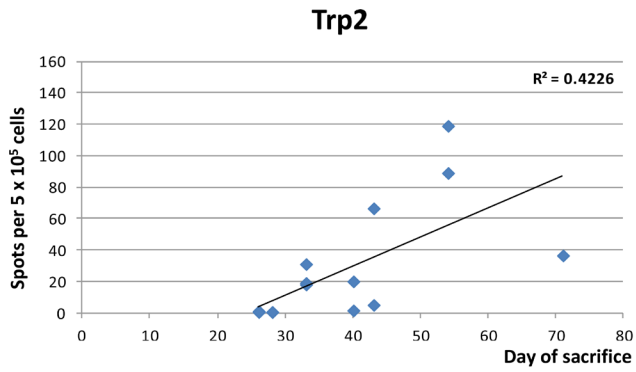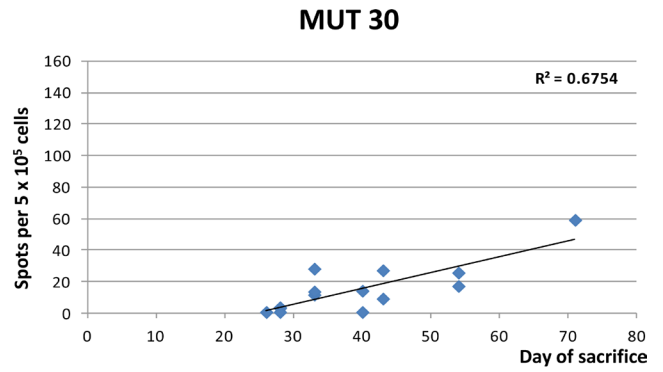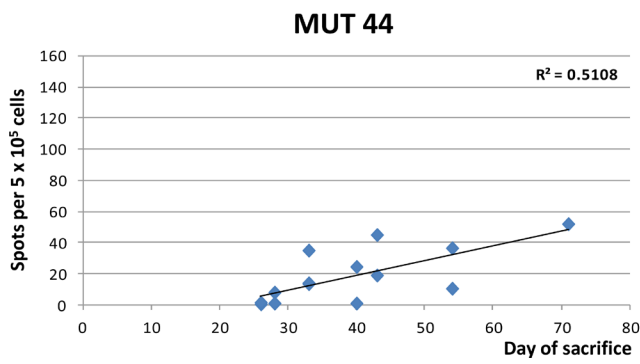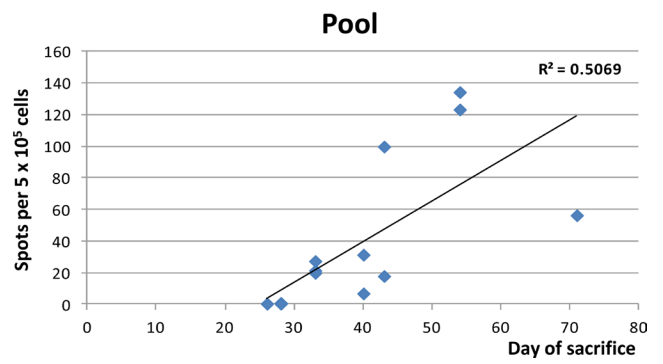

**Supplementary Figure 4: Correlation analysis between number of spots per  $5 \times 10^5$  splenocytes and day of sacrifice for each animal.**
